# Supplementary material
Source: PubMed Central journal article supplement (PMC7662481)
Supplement: jama-e2022760-s003.pdf [file jama-e2022760-s003.pdf]

# Data Sharing Statement

Lenze. Fluvoxamine vs Placebo and Clinical Deterioration in Outpatients With Symptomatic COVID-19. *JAMA*. Published November 12, 2020. 10.1001/jama.2020.22760

## Data

**Data available:** Yes

**Data types:** Deidentified participant data

**How to access data:** email [stevensa@wustl.edu](mailto:stevensa@wustl.edu)

**When available:** beginning date: 03-01-2021

## Supporting Documents

**Document types:** None

## Additional Information

**Who can access the data:** researchers whose proposed use of the data has been approved

**Types of analyses:** for pre-planned analyses and meta-analyses (if applicable)

**Mechanisms of data availability:** after approval of a proposal

**Any additional restrictions:** n/a
